# Supplementary material for: Serological Survey of Lyssaviruses in Polish Bats in the Frame of Passive Rabies Surveillance Using an Enzyme-Linked Immunosorbent Assay
Source: MDPI journal article supplement (doi:10.3390/v12030271), 2020-02-28
Supplement: s1 [file s1]

| FLI-ID N°. | Species             | origin  | Original-date | Original-Nr | RFFIT<br>Titer | ProBIO ELISA |              |       | Animal trial N° | Reference                                                                                                                                                                                       |
|------------|---------------------|---------|---------------|-------------|----------------|--------------|--------------|-------|-----------------|-------------------------------------------------------------------------------------------------------------------------------------------------------------------------------------------------|
|            |                     |         |               |             |                | OD-values    | %-inhibition | ELISA |                 |                                                                                                                                                                                                 |
| 12481      | Eptesicus fuscus    | USA     | 10.08.2005    | 66314       | <1:10          | 0,5244       | 56,391       | POS   | 745/2005        | Franka, R., et al. (2008).<br>"Susceptibility of North American big brown bats (Eptesicus fuscus) to infection with European bat lyssavirus type 1." Journal of General Virology 89: 1998-2010. |
| 12482      |                     |         |               | 66788       | <1:10          | 1,0477       | 5,2704       | NEG   | 745/2005        |                                                                                                                                                                                                 |
| 12483      |                     |         |               | 62859       | <1:10          | 1,0388       | 6,1398       | NEG   | 745/2005        |                                                                                                                                                                                                 |
| 12484      |                     |         |               | 60286       | <1:10          | 1,1262       | -2,3983      | NEG   | 745/2005        |                                                                                                                                                                                                 |
| 12485      |                     |         |               | 60161       | <1:10          | 1,0873       | 1,4018       | NEG   | 745/2005        |                                                                                                                                                                                                 |
| 12486      |                     |         |               | 61682       | <1:10          | 0,9762       | 12,255       | NEG   | 745/2005        |                                                                                                                                                                                                 |
| 12489      |                     |         |               | 62076       | <1:10          | 1,0472       | 5,3192       | NEG   | 745/2005        |                                                                                                                                                                                                 |
| 12490      |                     |         |               | 62293       | <1:10          | 0,4687       | 61,833       | POS   | 745/2005        |                                                                                                                                                                                                 |
| 12491      |                     |         |               | 61131       | <1:10          | 1,0485       | 5,1922       | NEG   | 745/2005        |                                                                                                                                                                                                 |
| 12492      |                     |         |               | 67034       | <1:10          | 1,0581       | 4,2544       | NEG   | 745/2005        |                                                                                                                                                                                                 |
| 12494      |                     |         |               | 61400       | <1:10          | 0,6412       | 44,981       | POS   | 745/2005        |                                                                                                                                                                                                 |
| 12495      |                     |         |               | 58563       | <1:10          | 0,9377       | 16,016       | NEG   | 745/2005        |                                                                                                                                                                                                 |
| 12498      |                     |         |               | 59027       | <1:10          | 0,9616       | 13,681       | NEG   | 745/2005        |                                                                                                                                                                                                 |
| 12499      |                     |         |               | 62124       | <1:10          | 0,9815       | 11,737       | NEG   | 745/2005        |                                                                                                                                                                                                 |
| 12500      |                     |         |               | 60803       | <1:10          | 0,5676       | 52,171       | POS   | 745/2005        |                                                                                                                                                                                                 |
| 12501      |                     |         |               | 66944       | <1:10          | 1,0382       | 6,1984       | NEG   | 745/2005        |                                                                                                                                                                                                 |
| 12502      |                     |         |               | 60947       | <1:10          | 0,9722       | 12,646       | NEG   | 745/2005        |                                                                                                                                                                                                 |
| 12503      |                     |         |               | 60429       | <1:10          | 1,0283       | 7,1655       | NEG   | 745/2005        |                                                                                                                                                                                                 |
| 12504      |                     |         |               | 59501       | <1:10          | 1,0083       | 9,1193       | NEG   | 745/2005        |                                                                                                                                                                                                 |
| 12505      |                     |         |               | 63890       | <1:10          | 0,7388       | 35,447       | NEG   | 745/2005        |                                                                                                                                                                                                 |
| 12506      |                     |         |               | 59699       | <1:10          | 1,0147       | 8,4941       | NEG   | 745/2005        |                                                                                                                                                                                                 |
| 12507      |                     |         |               | 61399       | <1:10          | 1,0315       | 6,8529       | NEG   | 745/2005        |                                                                                                                                                                                                 |
| 12508      |                     |         |               | 61404       | <1:10          | 0,4437       | 64,275       | POS   | 745/2005        |                                                                                                                                                                                                 |
| 12509      |                     |         |               | 57612       | <1:10          | 1,0094       | 9,0119       | NEG   | 745/2005        |                                                                                                                                                                                                 |
| 12510      |                     |         |               | 65219       | <1:10          | 0,9855       | 11,347       | NEG   | 745/2005        |                                                                                                                                                                                                 |
| 12512      |                     |         |               | 61808       | <1:10          | 0,8801       | 21,643       | NEG   | 745/2005        |                                                                                                                                                                                                 |
| 12513      |                     |         |               | 67087       | <1:10          | 0,5481       | 54,076       | POS   | 745/2005        |                                                                                                                                                                                                 |
| 12515      |                     |         |               | 62057       | <1:10          | 0,2945       | 78,85        | POS   | 745/2005        |                                                                                                                                                                                                 |
| 12532      |                     |         |               | 58431       | <1:10          | 0,8961       | 20,08        | NEG   | 745/2005        |                                                                                                                                                                                                 |
| 12533      |                     |         |               | 61665       | <1:10          | 0,9807       | 11,816       | NEG   | 745/2005        |                                                                                                                                                                                                 |
| 12534      |                     |         |               | 66074       | <1:10          | 0,9652       | 13,33        | NEG   | 745/2005        |                                                                                                                                                                                                 |
| 12535      |                     |         |               | 65962       | <1:10          | 1,0694       | 3,1505       | NEG   | 745/2005        |                                                                                                                                                                                                 |
| 12536      |                     |         |               | 57030       | <1:10          | 1,0071       | 9,2366       | NEG   | 745/2005        |                                                                                                                                                                                                 |
| 12537      |                     |         |               | 60944       | <1:10          | 0,921        | 17,648       | NEG   | 745/2005        |                                                                                                                                                                                                 |
| 12538      |                     |         |               | EF43 -      | <1:10          | 1,0115       | 8,8067       | NEG   | 745/2005        |                                                                                                                                                                                                 |
| 13574      |                     |         | 24.11.2005    | 61808       | <1:10          | 1,0915       | 15,341       | NEG   | 745/2005        |                                                                                                                                                                                                 |
| 13575      |                     |         |               | 67087       | <1:10          | 1,1445       | 10,732       | NEG   | 745/2005        |                                                                                                                                                                                                 |
| 13576      |                     |         |               | 62057       | <1:10          | 0,4449       | 71,575       | POS   | 745/2005        |                                                                                                                                                                                                 |
| 13579      |                     |         |               | 63890       | <1:10          | 1,0465       | 19,255       | NEG   | 745/2005        |                                                                                                                                                                                                 |
| 13580      |                     |         |               | 61131       | <1:10          | 1,168        | 8,6881       | NEG   | 745/2005        |                                                                                                                                                                                                 |
| 13581      |                     |         |               | 67034       | <1:10          | 1,2366       | 2,7221       | NEG   | 745/2005        |                                                                                                                                                                                                 |
| 13583      |                     |         |               | 58563       | 20/40          | 1,2305       | 3,2526       | NEG   | 745/2005        |                                                                                                                                                                                                 |
| 13584      |                     |         |               | 59027       | <1:10          | 1,1278       | 12,184       | NEG   | 745/2005        |                                                                                                                                                                                                 |
| 13585      |                     |         |               | 61400       | <1:10          | 0,6685       | 52,129       | POS   | 745/2005        |                                                                                                                                                                                                 |
| 13586      |                     |         |               | 62859       | <1:10          | 1,29         | -1,922       | NEG   | 745/2005        |                                                                                                                                                                                                 |
| 13587      |                     |         |               | 66074       | <1:10          | 1,1896       | 6,8096       | NEG   | 745/2005        |                                                                                                                                                                                                 |
| 13589      |                     |         |               | 57030       | <1:10          | 1,1885       | 6,9052       | NEG   | 745/2005        |                                                                                                                                                                                                 |
| 13590      |                     |         |               | 60944       | <1:10          | 1,1516       | 10,114       | NEG   | 745/2005        |                                                                                                                                                                                                 |
| 13591      |                     |         |               | 58431       | <1:10          | 1,1824       | 7,4358       | NEG   | 745/2005        |                                                                                                                                                                                                 |
| 13592      |                     |         |               | 65962       | <1:10          | 1,1575       | 9,6013       | NEG   | 745/2005        |                                                                                                                                                                                                 |
| 13593      |                     |         |               | 61665       | n.a.           | 1,2402       | 2,409        | NEG   | 745/2005        |                                                                                                                                                                                                 |
| 13594      |                     |         |               | 61399       | <1:10          | 1,278        | -0,87838     | NEG   | 745/2005        |                                                                                                                                                                                                 |
| 13595      |                     |         |               | 60947       | <1:10          | 1,155        | 9,8187       | NEG   | 745/2005        |                                                                                                                                                                                                 |
| 13596      |                     |         |               | 59501       | <1:10          | 1,1589       | 9,4795       | NEG   | 745/2005        |                                                                                                                                                                                                 |
| 13597      |                     |         |               | 59699       | <1:10          | 1,2015       | 5,7747       | NEG   | 745/2005        |                                                                                                                                                                                                 |
| 13598      |                     |         |               | 60286       | <1:10          | 1,1715       | 8,3837       | NEG   | 745/2005        |                                                                                                                                                                                                 |
| 13599      |                     |         |               | 66944       | <1:10          | 1,1411       | 11,028       | NEG   | 745/2005        |                                                                                                                                                                                                 |
| 13600      |                     |         |               | 61682       | <1:10          | 1,1942       | 6,4095       | NEG   | 745/2005        |                                                                                                                                                                                                 |
| 13601      |                     |         |               | 66788       | <1:10          | 1,1426       | 10,897       | NEG   | 745/2005        |                                                                                                                                                                                                 |
| 13602      |                     |         |               | 66314       | <1:10          | 0,7791       | 42,51        | POS   | 745/2005        |                                                                                                                                                                                                 |
| 16816      | Eptesicus serotinus | Germany | 16.08.2007    | 31923       | n.a.           | 0,9309       | 16,681       | NEG   | 1085/2007       | Freuling, C., et al. (2009).<br>"Experimental infection of serotine bats (Eptesicus serotinus) with European bat lyssavirus type 1a." Journal of General Virology 90(10): 2493-2502.            |
| 16818      |                     |         |               | 29725       | <1:10          | 0,9994       | 9,9888       | NEG   | 1085/2007       |                                                                                                                                                                                                 |
| 16819      |                     |         |               | 33841       | <1:10          | 0,9559       | 14,238       | NEG   | 1085/2007       |                                                                                                                                                                                                 |
| 16820      |                     |         |               | 27896       | n.a.           | 0,9841       | 11,483       | NEG   | 1085/2007       |                                                                                                                                                                                                 |
| 16821      |                     |         |               | 29107       | <1:10          | 0,9447       | 15,332       | NEG   | 1085/2007       |                                                                                                                                                                                                 |
| 16822      |                     |         |               | 34550       | <1:10          | 1,0041       | 9,5296       | NEG   | 1085/2007       |                                                                                                                                                                                                 |
| 16823      |                     |         |               | 25599       | n.a.           | 0,9709       | 12,773       | NEG   | 1085/2007       |                                                                                                                                                                                                 |
| 16825      |                     |         |               | 32475       | <1:10          | 1,0549       | 4,567        | NEG   | 1085/2007       |                                                                                                                                                                                                 |
| 16826      |                     |         |               | 32631       | <1:10          | 0,982        | 11,689       | NEG   | 1085/2007       |                                                                                                                                                                                                 |
| 16828      |                     |         |               | 34620       | n.a.           | 0,9756       | 12,314       | NEG   | 1085/2007       |                                                                                                                                                                                                 |
| 16829      |                     |         |               | 34526       | <1:10          | 1,0265       | 7,3414       | NEG   | 1085/2007       |                                                                                                                                                                                                 |
| 18186      |                     |         |               | 29579       | n.a.           | 1,022        | 7,781        | NEG   | 1085/2007       |                                                                                                                                                                                                 |
| 18187      |                     |         |               | 31088       | <1:10          | 0,9626       | 13,584       | NEG   | 1085/2007       |                                                                                                                                                                                                 |
| 18188      |                     |         |               | 31263       | <1:10          | 1,0478       | 5,2606       | NEG   | 1085/2007       |                                                                                                                                                                                                 |
| 18189      |                     |         |               | 32990       | <1:10          | 0,903        | 19,406       | NEG   | 1085/2007       |                                                                                                                                                                                                 |
| 18190      |                     |         |               | 29033       | <1:10          | 0,964        | 13,447       | NEG   | 1085/2007       |                                                                                                                                                                                                 |
| 18191      |                     |         |               | 29614       | <1:10          | 0,9313       | 16,641       | NEG   | 1085/2007       |                                                                                                                                                                                                 |
| 18192      |                     |         |               | 32373       | <1:10          | 0,9771       | 12,167       | NEG   | 1085/2007       |                                                                                                                                                                                                 |
| 18194      |                     |         |               | 30896       | <1:10          | 0,9105       | 18,673       | NEG   | 1085/2007       |                                                                                                                                                                                                 |
| 18195      |                     |         |               | 31215       | <1:10          | 0,9614       | 13,701       | NEG   | 1085/2007       |                                                                                                                                                                                                 |
| 18196      |                     |         |               | 32361       | <1:10          | 1,0383       | 6,1886       | NEG   | 1085/2007       |                                                                                                                                                                                                 |
| 18197      |                     |         |               | 29460       | <1:10          | 0,9869       | 11,21        | NEG   | 1085/2007       |                                                                                                                                                                                                 |
| 18198      |                     |         |               | 34392       | <1:10          | 0,9406       | 15,733       | NEG   | 1085/2007       |                                                                                                                                                                                                 |
| 18199      |                     |         |               | 33342       | <1:10          | 0,9674       | 13,115       | NEG   | 1085/2007       |                                                                                                                                                                                                 |
| 18200      |                     |         |               | 30892       | n.a.           | 0,9963       | 10,292       | NEG   | 1085/2007       |                                                                                                                                                                                                 |
| 18201      |                     |         |               | 27030       | <1:10          | 0,9796       | 11,923       | NEG   | 1085/2007       |                                                                                                                                                                                                 |
| 18202      |                     |         |               | 31638       | <1:10          | 0,9742       | 12,451       | NEG   | 1085/2007       |                                                                                                                                                                                                 |
